# Supplementary material
Source: HighWire-hosted journal article supplement (https://openheart.bmj.com/content/10/2/e002457)
Supplement: inline-supplementary-material-1 [file inline-supplementary-material-1.pdf]

| <b>Table S1</b>                                                                               |           |            |            |
|-----------------------------------------------------------------------------------------------|-----------|------------|------------|
|                                                                                               | CL groups |            |            |
|                                                                                               | ≤5%       | 5-≤15%     | >15%       |
| A) Total number (n) of patients                                                               |           |            |            |
| ESC-PTP                                                                                       | 305       | 564        | 716        |
| RF-CL                                                                                         | 656       | 523        | 406        |
| CACS-CL                                                                                       | 828       | 290        | 467        |
| B) Number of patients (n) with obstructive CAD at coronary CTA                                |           |            |            |
| ESC-PTP                                                                                       | 14 (4.6)  | 69 (12.2)  | 303 (42.3) |
| RF-CL                                                                                         | 44 (6.4)  | 118 (22.9) | 224 (55.2) |
| CACS-CL                                                                                       | 29 (3.5)  | 71 (24.5)  | 286 (61.2) |
| C) Number of patients (n) undergoing revascularization within 120 days following coronary CTA |           |            |            |
| ESC-PTP                                                                                       | 0 (0.0)   | 11 (2.0)   | 80 (11.2)  |
| RF-CL                                                                                         | 4 (0.6)   | 18 (3.4)   | 69 (17.0)  |
| CACS-CL                                                                                       | 1 (0.1)   | 11 (3.8)   | 79 (16.9)  |

**Supplemental table 1:** Number of patients in total (A), with obstructive CAD (B), and undergoing revascularization within 120 days following coronary CTA (C) stratified by CL groups by different CL models.

Abbreviations: ESC=European Society of Cardiology; PTP=pre-test probability; CL=clinical likelihood; RF-CL=risk factor-weighted clinical likelihood; CACS-CL=coronary artery calcium score-weighted clinical likelihood.

| Table S2         |                  |                  |
|------------------|------------------|------------------|
| Primary endpoint | Harrell's c      | Somers' D        |
| <b>ESC-PTP</b>   | 0.64 (0.53-0.77) | 0.31 (0.05-0.58) |
| <b>RF-CL</b>     | 0.70 (0.59-0.80) | 0.42 (0.16-0.65) |
| <b>CACS-CL</b>   | 0.76 (0.64-0.85) | 0.54 (0.26-0.81) |

**Supplemental table 2:** Harrell's C and Somers' D for the clinical endpoint of non-fatal myocardial infarction and cardiovascular death stratified by CL models.

Abbreviations: ESC=European Society of Cardiology; PTP=pre-test probability; CL=clinical likelihood; RF-CL=risk factor-weighted clinical likelihood; CACS-CL=coronary artery calcium score-weighted clinical likelihood.
